# Supplementary material for: DCAF1-based PROTACs with activity against clinically validated targets overcoming intrinsic- and acquired-degrader resistance
Source: PubMed Central journal article supplement (PMC10766610; doi:10.1038/s41467-023-44237-4), 2024-01-04
Supplement: 41467_2023_44237_MOESM14_ESM.pdf [file 41467_2023_44237_MOESM14_ESM.pdf]

**Title:** Supplementary Data 1:

**Description:** Genes included in the DepMap analysis

**Title:** Supplementary Data 2:

**Description:** Raw data of chemical proteomics experiment in HEK293T cells with compound (16)

**Title:** Supplementary Data 3:

**Description:** Details of the sgRNA library used in BRD9 degradation rescue experiment

**Title:** Supplementary Data 4:

**Description:** Raw data of the BRD9 degradation rescue experiment

**Title:** Supplementary Data 5:

**Description:** Genes classified as hits in the BRD9 degradation rescue experiment

**Title:** Supplementary Data 6:

**Description:** Raw data of the proteomics experiment comparing **DDa-1** and compound (13)

**Title:** Supplementary Data 7:

**Description:** Characterization data of the DCAF1 based BTK degrader and control compounds

**Title:** Supplementary Data 8:

**Description:** Raw data of the proteomics experiment comparing **DBt-10** and compound (19)

**Title:** Supplementary Data 9:

**Description:** Compound IDs and SMILES codes

**Title:** Supplementary Data 10:

**Description:** Key resource table
